# Supplementary material for: Control of Bacillus subtilis Replication Initiation during Physiological Transitions and Perturbations
Source: PubMed Central journal article supplement (PMC6918070; doi:10.1128/mbio.02205-19), 2019-12-17

**A** Cell length versus growth rate with chloramphenicol

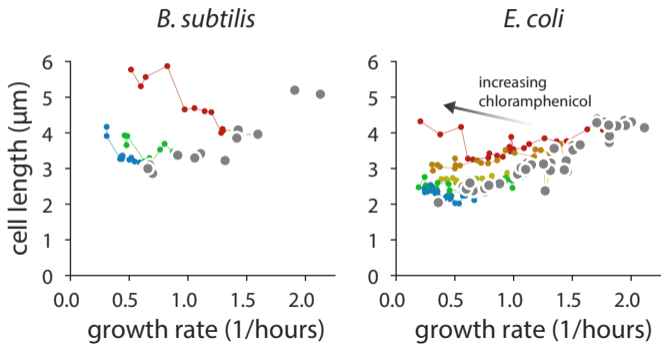

**B** C period versus growth rate with chloramphenicol

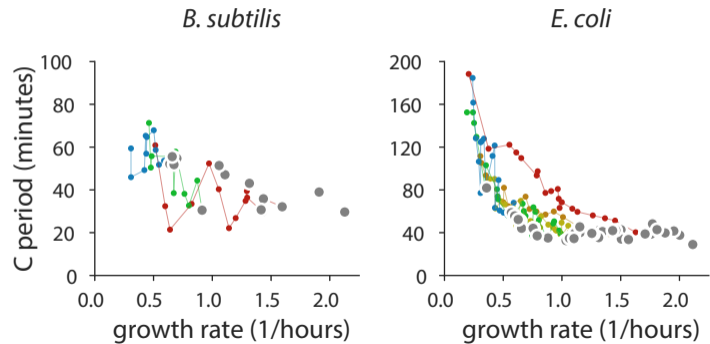

Supplement: mBio.02205-19-sf003.pdf [file mBio.02205-19-sf003.pdf]
