# Supplementary material for: Control of Bacillus subtilis Replication Initiation during Physiological Transitions and Perturbations
Source: PubMed Central journal article supplement (PMC6918070; doi:10.1128/mbio.02205-19), 2019-12-17

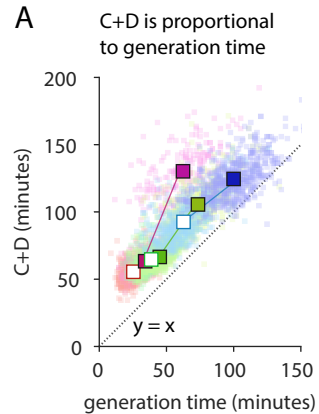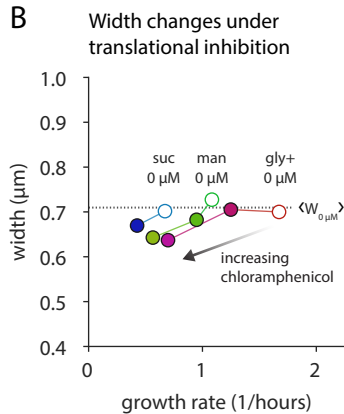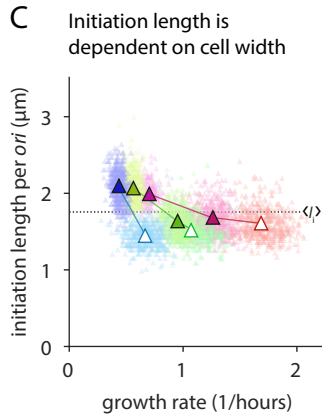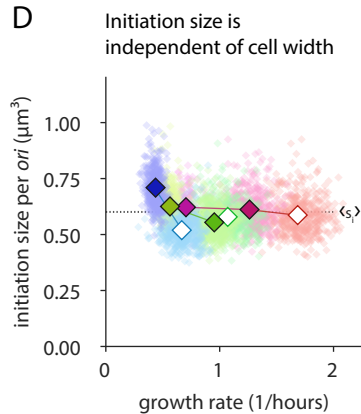

Supplement: mBio.02205-19-sf005.pdf [file mBio.02205-19-sf005.pdf]
