# Supplementary material for: Control of Bacillus subtilis Replication Initiation during Physiological Transitions and Perturbations
Source: PubMed Central journal article supplement (PMC6918070; doi:10.1128/mbio.02205-19), 2019-12-17

## A *B. subtilis* physiological parameter distributions

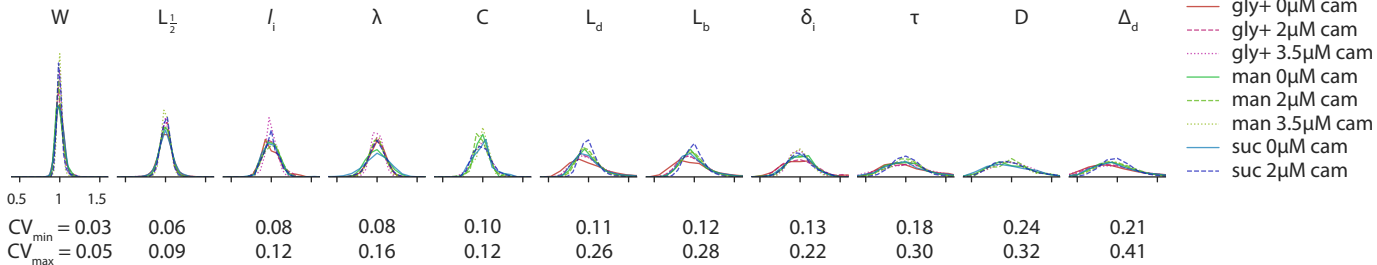

## B *E. coli* physiological parameter distributions

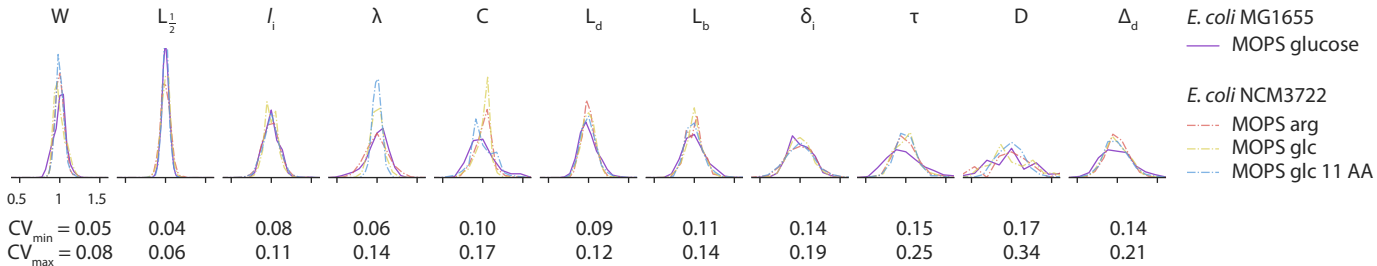

Supplement: mBio.02205-19-sf007.pdf [file mBio.02205-19-sf007.pdf]
